# Supplementary material
Source: PubMed Central journal article supplement (PMC3237802)
Supplement: NIHMS331952-supplement-1.pdf [file NIHMS331952-supplement-1.pdf]

Figure S1

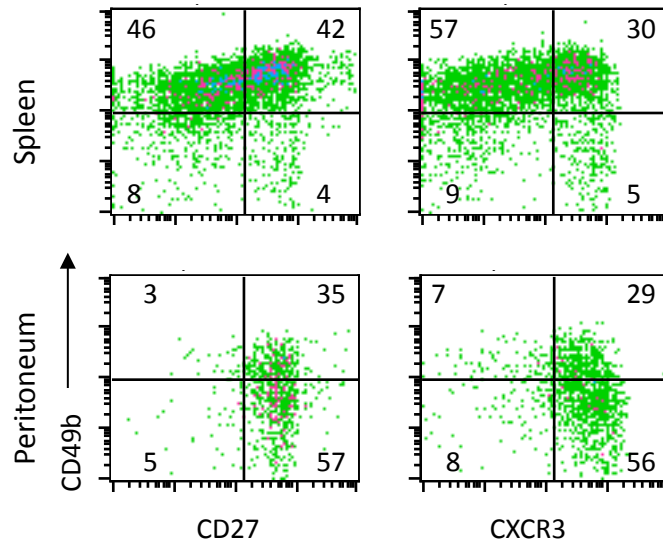

**Figure S1. Phenotypic comparison between splenic and peritoneal NK cells in wild type mice.** Spleen (upper row) and peritoneal (lower row) cells from C57Bl/6 mice were stained for NK1.1, CD3, CD49b, CD27, and CXCR3. Density plots were gated on NK1.1<sup>+</sup>CD3<sup>-</sup> cells. Numbers represent the percentage of NK cells that fall within each quadrant. Each marker was analyzed for two to four mice.

Figure S2

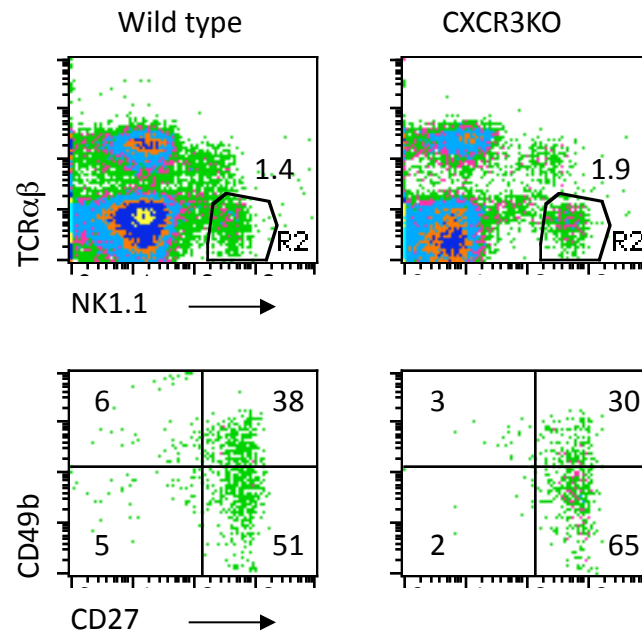

**Figure S2. CXCR3KO mice do not lack peNK cells.** Peritoneal cells were collected from either C57Bl/6 (left column) or CXCR3KO mice (right column) and percentage of NK1.1+/TCRαβ- cells determined (upper row), as well as their expression of CD49b and CD27 (lower row, using R2 gate). Numbers in the upper row plots represent percentages of NK1.1+/TCRαβ- cells. Numbers in each quadrant of the lower row plots represent the percentage of gated cells that fall within that quadrant. Data represent one mouse out of two tested in two individual experiments.

Figure S3

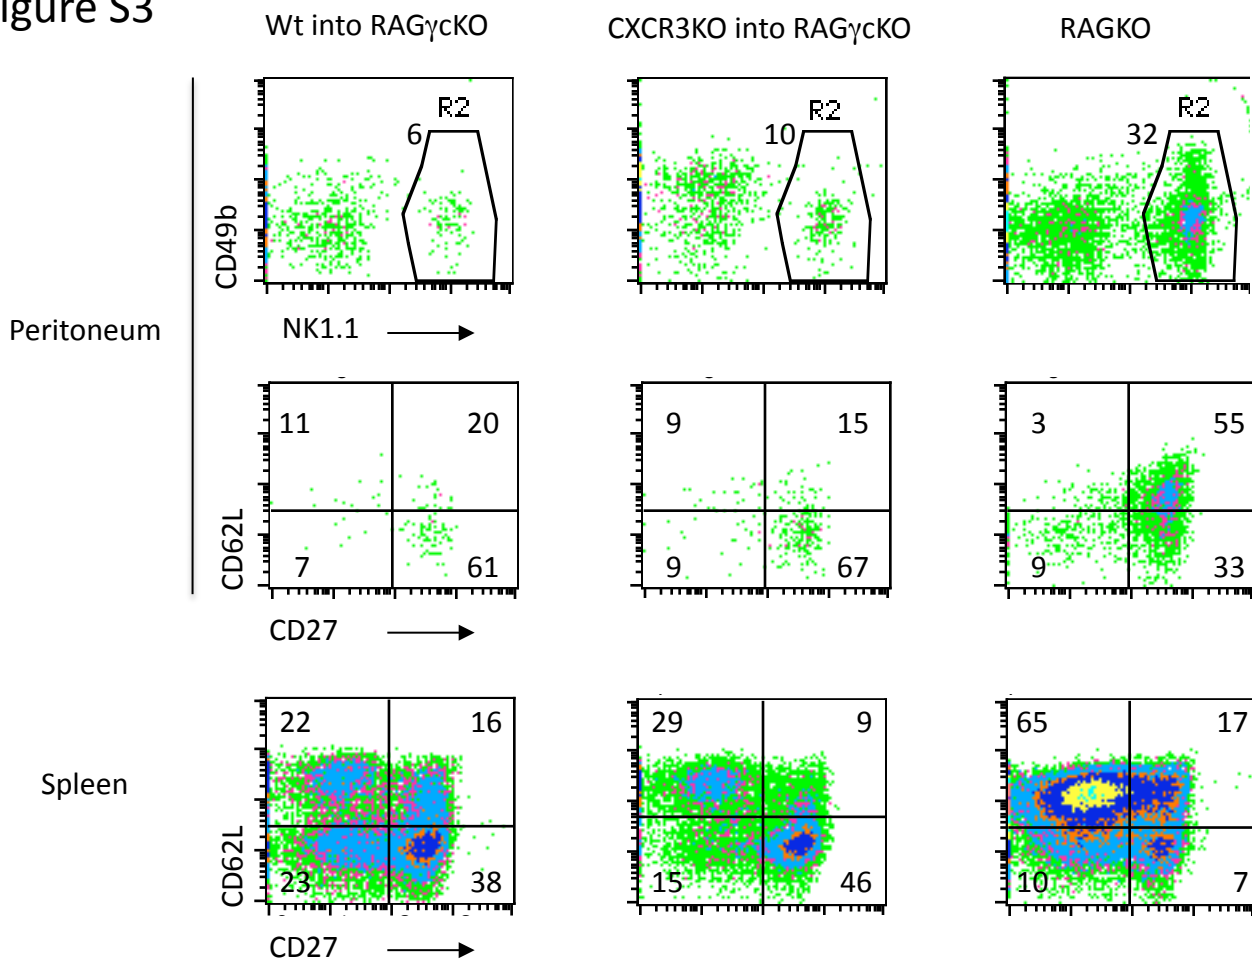

**Figure S3. CXCR3 is not necessary for migration of immature NK cells into the peritoneum and CD62L is not necessary for their persistence in the peritoneum under steady state conditions.**  $7 \times 10^5$  sorted splenic NK1.1<sup>+</sup>/CD3<sup>-</sup> cells from either wild type (left row) or CXCR3KO (middle row) mice were transferred separately i.v. into RagγCKO mice. Fifteen days later, peritoneal (upper and middle row) and spleen (lower row) cells were collected and their percentage of NK1.1<sup>+</sup> and expression CD49b analyzed (upper row), as well as their expression of CD27 and CD62L (middle and lower row, gated on NK1.1<sup>+</sup> cells). A RAGKO mouse (right column) was stained in same way for comparison purposes. Numbers in the upper row plots represent percentages of NK1.1<sup>+</sup> cells. Numbers in each quadrant of the middle and lower row plots represent the percentage of gated cells that fall within that quadrant. Data represent one mouse out of two tested.

Figure S4

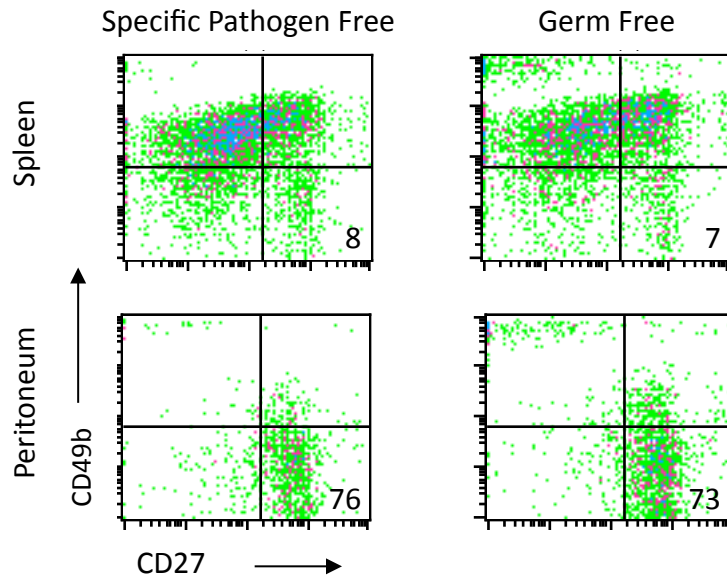

**Figure S4. peNK cells are not dependent on endogenous microflora.** Spleen and peritoneal cells were collected from conventionally raised (Specific Pathogen Free: left column) or Germ free (right column) B10.A mice. Cells were stained with antibodies for NK1.1, CD3ε, CD49b and CD27. Numbers in the lower right quadrants of the density plots represent the percentage of CD49b<sup>-</sup>/CD27<sup>+</sup> cells within the NK1.1<sup>+</sup>/CD3ε<sup>-</sup> gate. Data represent two mice out of four tested.
